# Supplementary material for: A Strategy To Estimate Unknown Viral Diversity in Mammals
Source: PubMed Central journal article supplement — mBio. 2013 Sep 3;4(5):e00598-13. doi: 10.1128/mBio.00598-13 (PMC3760253; doi:10.1128/mbio.00598-13), 2013-09-03
Supplement: mbo004131613st1.pdf [file mbo004131613st1.pdf]

| Number of viruses detected in a single sample | # Positive Samples / # Tested (%) |                          |               |                        | Total                     |
|-----------------------------------------------|-----------------------------------|--------------------------|---------------|------------------------|---------------------------|
|                                               | Urine                             | Throat                   | Faeces        | Roost Urine            |                           |
| <b>Herpesvirus</b>                            |                                   |                          |               |                        |                           |
| 1                                             | 50 / 926 (5.4%)                   | 84 / 711 (11.8%)         | 0 / 78        | 1 / 26 (3.8%)          | 135 / 1741                |
| 2                                             | 10 / 926 (1.1%)                   | 94 / 711 (13.2%)         | 0 / 78        | 0 / 26 (0%)            | 104 / 1741                |
| 3                                             | 2 / 926 (0.2%)                    | 72 / 711 (10.1%)         | 0 / 78        | 0 / 26 (0%)            | 74 / 1741                 |
| 4                                             | 0 / 926 (0%)                      | 16 / 711 (2.3%)          | 0 / 78        | 0 / 26 (0%)            | 10 / 1741                 |
| 5                                             | 1 / 926 (0.1%)                    | 0 / 711 (0%)             | 0 / 78        | 0 / 26 (0%)            | 1 / 1741                  |
| <b>TOTAL Positive Samples</b>                 | <b>63 / 926 (6.8%)</b>            | <b>260 / 711 (36.6%)</b> | <b>0 / 78</b> | <b>1 / 26 (3.8%)</b>   | <b>324 / 1741 (18.6%)</b> |
| <b>TOTAL Samples with &gt;1 virus</b>         | <b>13 / 926 (1.4%)</b>            | <b>182 / 711 (25.6%)</b> | <b>0 / 78</b> | <b>0 / 26 (0%)</b>     | <b>195 / 1741 (11.2%)</b> |
| <b>Paramyxovirus</b>                          |                                   |                          |               |                        |                           |
| 1                                             | 9 / 598 (1.5%)                    | 18 / 510 (3.5%)          | N/T           | N/T                    | 27 / 1108 (2.4%)          |
| <b>TOTAL Positive Samples</b>                 | <b>9 / 598 (1.5%)</b>             | <b>18 / 510 (3.5%)</b>   | <b>N/T</b>    | <b>N/T</b>             | <b>27 / 1108 (2.4%)</b>   |
| <b>TOTAL Samples with &gt;1 virus</b>         | <b>0 / 598 (0%)</b>               | <b>0 / 510 (0%)</b>      | <b>N/T</b>    | <b>N/T</b>             | <b>0 / 1108 (0%)</b>      |
| <b>Polyomavirus</b>                           |                                   |                          |               |                        |                           |
| 1                                             | 4 / 598 (0.7%)                    | 4 / 510 (0.8%)           | N/T           | N/T                    | 8 / 1108 (0.7%)           |
| <b>TOTAL Positive Samples</b>                 | <b>4 / 598 (0.7%)</b>             | <b>4 / 510 (0.8%)</b>    | <b>N/T</b>    | <b>N/T</b>             | <b>8 / 1108 (0.7%)</b>    |
| <b>TOTAL Samples with &gt;1 virus</b>         | <b>0 / 598 (0%)</b>               | <b>0 / 510 (0%)</b>      | <b>N/T</b>    | <b>N/T</b>             | <b>0 / 1108 (0%)</b>      |
| <b>Coronavirus</b>                            |                                   |                          |               |                        |                           |
| 1                                             | 42 / 816 (5.1%)                   | 12 / 745 (1.6%)          | N/T           | 22 / 70 (31.4%)        | 76 / 1631 (4.7%)          |
| <b>TOTAL Positive Samples</b>                 | <b>42 / 816 (5.1%)</b>            | <b>12 / 745 (1.6%)</b>   | <b>N/T</b>    | <b>22 / 70 (31.4%)</b> | <b>76 / 1631 (4.7%)</b>   |
| <b>TOTAL Samples with &gt;1 virus</b>         | <b>0 / 816 (0%)</b>               | <b>0 / 745 (0%)</b>      | <b>N/T</b>    | <b>0 / 70 (0%)</b>     | <b>0 / 1631 (0%)</b>      |
| <b>Adenovirus</b>                             |                                   |                          |               |                        |                           |
| 1                                             | 110 / 931 (11.8%)                 | 35 / 806 (4.3%)          | 0 / 78        | 15 / 87 (17.2%)        | 160 / 1902 (8.4%)         |
| 2                                             | 13 / 931 (1.4%)                   | 3 / 806 (0.4%)           | 0 / 78        | 1 / 87 (1.1%)          | 17 / 1902 (0.9%)          |
| 3                                             | 1 / 931 (0.1%)                    | 0 / 806 (0%)             | 0 / 78        | 0 / 87 (0%)            | 1 / 1902 (0.05%)          |
| <b>TOTAL Positive Samples</b>                 | <b>124 / 931 (13.3%)</b>          | <b>38 / 806 (4.7%)</b>   | <b>0 / 78</b> | <b>16 / 87 (18.4%)</b> | <b>178 / 1902 (9.4%)</b>  |
| <b>TOTAL Samples with &gt;1 virus</b>         | <b>14 / 931 (1.5%)</b>            | <b>3 / 806 (0.4%)</b>    | <b>0 / 78</b> | <b>1 / 87 (1.1%)</b>   | <b>18 / 1902 (0.9%)</b>   |
| <b>Astrovirus</b>                             |                                   |                          |               |                        |                           |
| 1                                             | 5 / 696 (0.7%)                    | 1 / 585 (0.2%)           | N/T           | 9 / 67 (13.4%)         | 15 / 1348 (1.1%)          |
| 2                                             | 0 / 696 (0%)                      | 0 / 585 (0%)             | N/T           | 9 / 67 (13.4%)         | 9 / 1348 (0.7%)           |
| 3                                             | 0 / 696 (0%)                      | 0 / 585 (0%)             | N/T           | 1 / 67 (1.5%)          | 1 / 1348 (0.07%)          |
| <b>TOTAL Positive Samples</b>                 | <b>5 / 696 (0.7%)</b>             | <b>1 / 585 (0.2%)</b>    | <b>N/T</b>    | <b>19 / 67 (28.4%)</b> | <b>25 / 1348 (1.9%)</b>   |
| <b>TOTAL Samples with &gt;1 virus</b>         | <b>0 / 696 (0%)</b>               | <b>0 / 585 (0%)</b>      | <b>N/T</b>    | <b>10 / 67 (15.0%)</b> | <b>10 / 1348 (0.7%)</b>   |
| <b>Bocavirus</b>                              |                                   |                          |               |                        |                           |
| 1                                             | 1 / 925 (0.1%)                    | 1 / 710 (0.14%)          | 0 / 78        | 0 / 26                 | 1 / 1739 (0.06%)          |
| <b>TOTAL Positive Samples</b>                 | <b>1 / 925 (0.1%)</b>             | <b>1 / 710 (0.14%)</b>   | <b>0 / 78</b> | <b>0 / 26</b>          | <b>1 / 1739 (0.06%)</b>   |
| <b>TOTAL Samples with &gt;1 virus</b>         | <b>0 / 925 (0%)</b>               | <b>0 / 710 (0%)</b>      | <b>0 / 78</b> | <b>0 / 26</b>          | <b>0 / 1739 (0%)</b>      |
