# Supplementary figures and images for: A Strategy To Estimate Unknown Viral Diversity in Mammals
Source: PubMed Central journal article supplement — mBio. 2013 Sep 3;4(5):e00598-13. doi: 10.1128/mBio.00598-13 (PMC3760253; doi:10.1128/mbio.00598-13), 2013-09-03

Relative Frequency

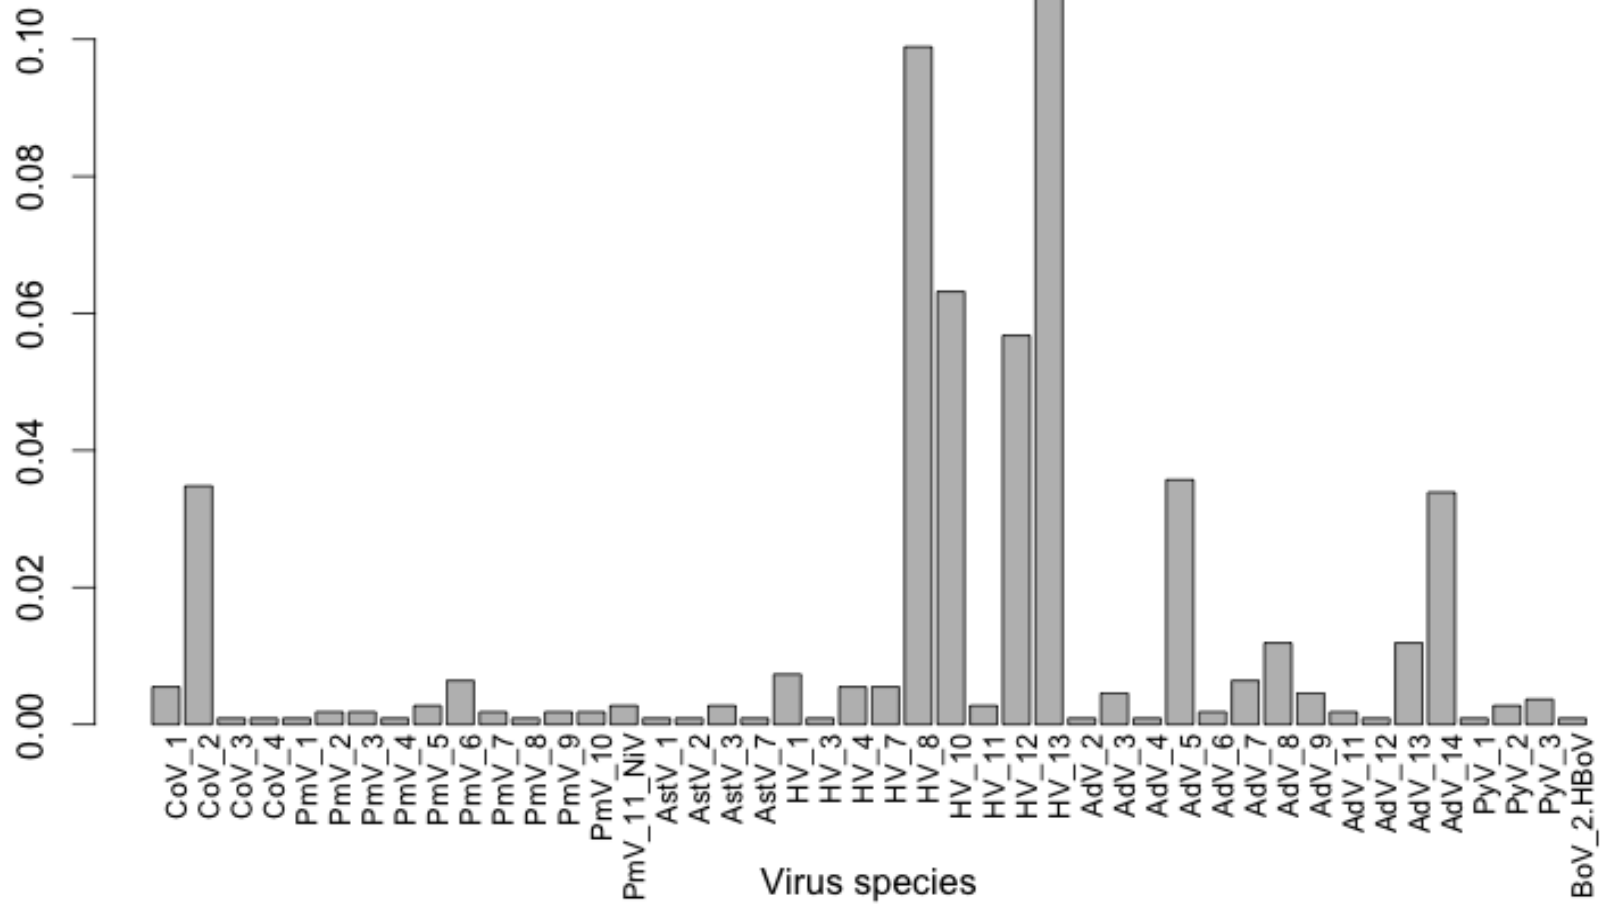

Supplement: mbo004131613sf01.pdf [file mbo004131613sf01.pdf]

# All Viruses

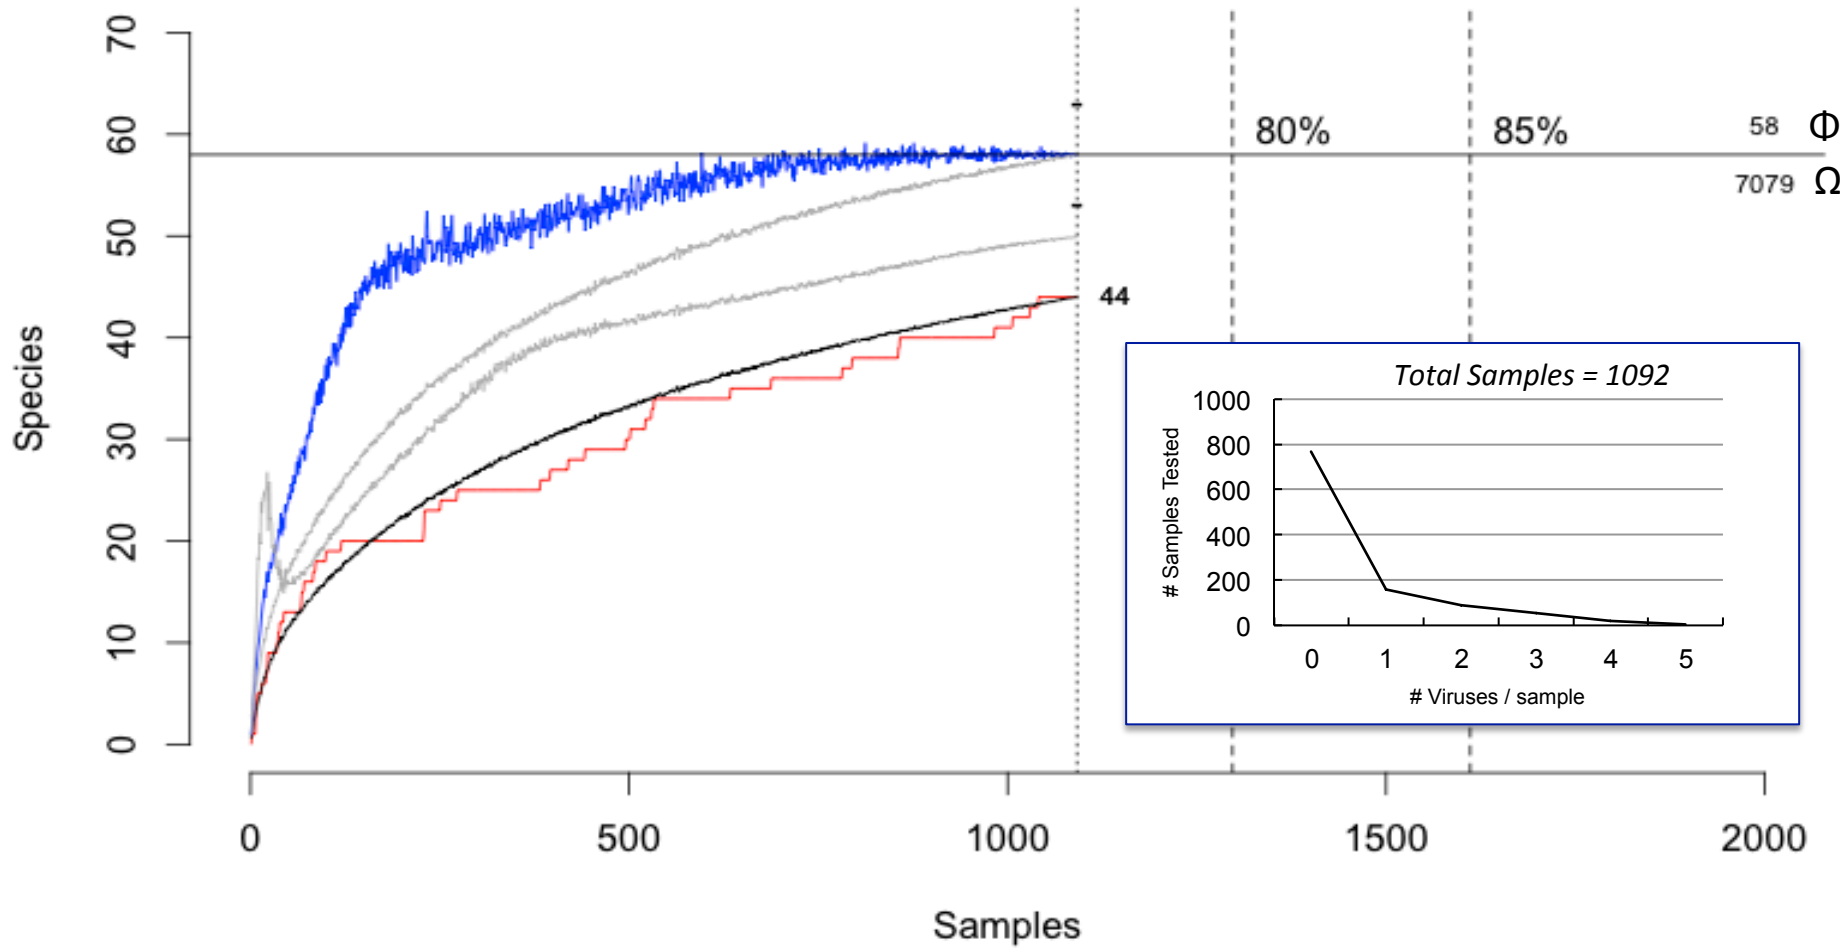

## PMV

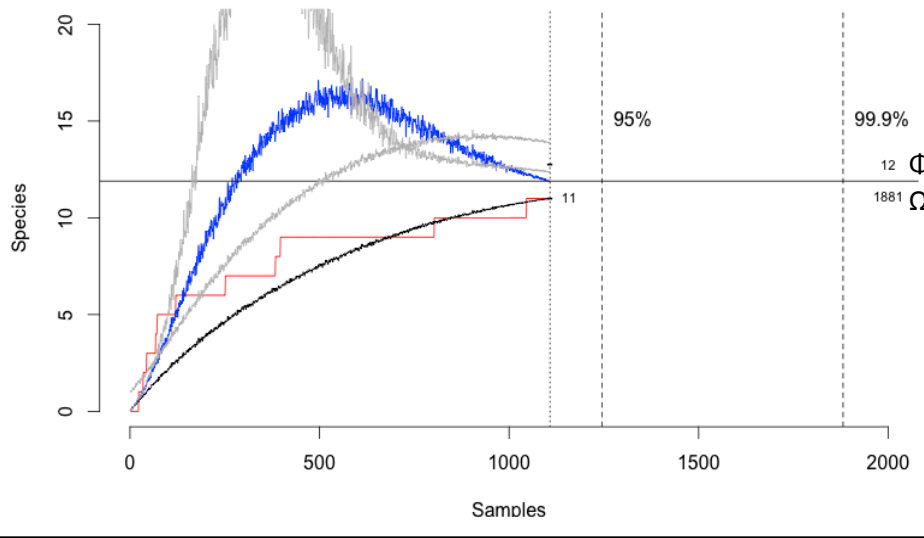

## AstV

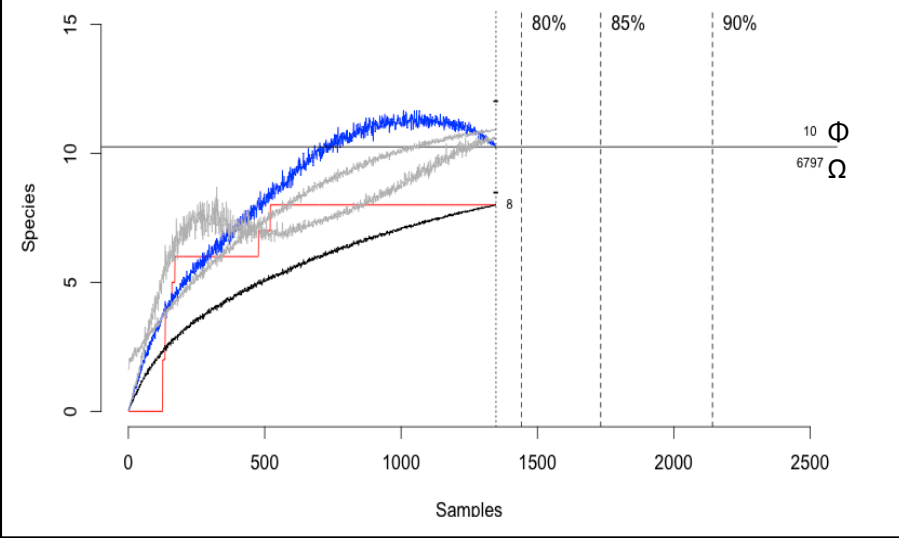

## HV

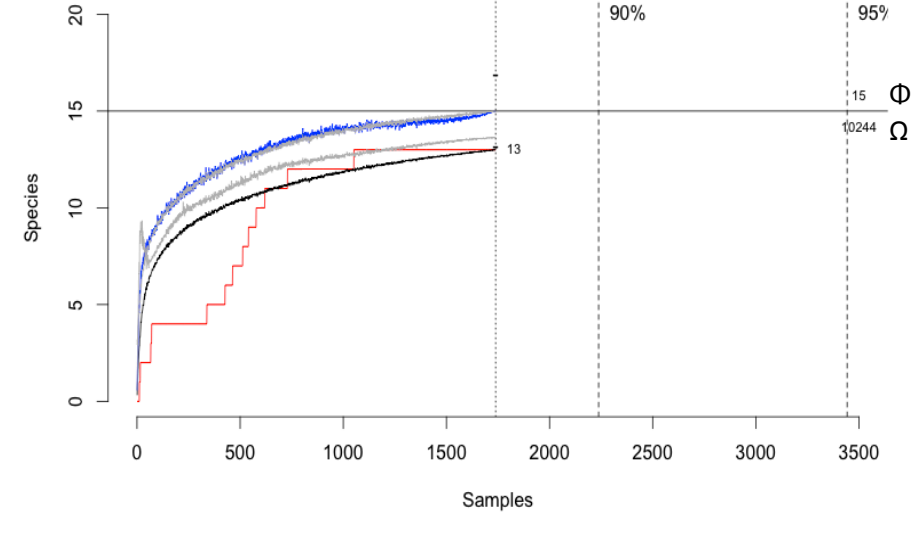

## AdV

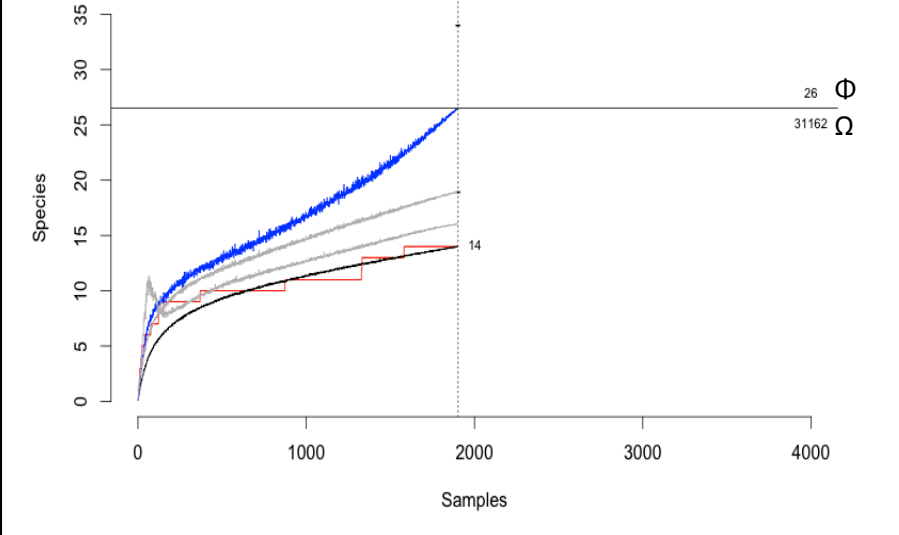

Supplement: mbo004131613sf02.pdf [file mbo004131613sf02.pdf]
